# Supplementary material
Source: PubMed Central journal article supplement (PMC6377297)
Supplement: NIHMS1512412-supplement-1.pdf [file NIHMS1512412-supplement-1.pdf]

Supplemental Material

## A Hard Days Night: Cyanobacteria in Diel Cycles

David G. Welkie<sup>1</sup>, Benjamin E. Rubin<sup>2</sup>, Spencer Diamond<sup>3</sup>, Rachel D. Hood<sup>4</sup>, David F. Savage<sup>4</sup>, Susan S. Golden<sup>1, 2,\*</sup>

<sup>1</sup> Center for Circadian Biology, University of California, San Diego, La Jolla, CA 92093; <sup>2</sup> Division of Biological Sciences, University of California, San Diego, La Jolla, CA 92093; <sup>3</sup> Department of Earth and Planetary Science, UC Berkeley, Berkeley, CA 94720; <sup>4</sup> Department of Molecular and Cell Biology, UC Berkeley, Berkeley, CA 94720

\*Correspondence: [sgolden@ucsd.edu](mailto:sgolden@ucsd.edu) (S.S. Golden).

**Table S1 Genes whose expression exhibits diurnal cycling or increases upon exposure to low light / dark conditions.**

| Genes important for fitness in LDC | Genes induced by dark exposure in night phase (Kai-dependent) | Genes induced in dark exposure in day phase (Kai-independent) | Genes induced by dark exposure in day phase (Kai-dependent) | Genes induced by shade pulse in day phase * |
|------------------------------------|---------------------------------------------------------------|---------------------------------------------------------------|-------------------------------------------------------------|---------------------------------------------|
| Ref: [S1]                          | Ref: [S2]                                                     | Ref: [S2]                                                     | Ref: [S3]                                                   | Ref: [S4]                                   |
| Synpcc7942_0002                    | Synpcc7942_0004                                               | Synpcc7942_0096                                               | Synpcc7942_0069                                             | Synpcc7942_0005                             |
| Synpcc7942_0039                    | Synpcc7942_0032                                               | Synpcc7942_0147                                               | Synpcc7942_0108                                             | Synpcc7942_0032                             |
| Synpcc7942_0086                    | Synpcc7942_0033                                               | Synpcc7942_0162                                               | Synpcc7942_0147                                             | Synpcc7942_0033                             |
| Synpcc7942_0092                    | Synpcc7942_0052                                               | Synpcc7942_0163                                               | Synpcc7942_0162                                             | Synpcc7942_0034                             |
| Synpcc7942_0095                    | Synpcc7942_0086                                               | Synpcc7942_0193                                               | Synpcc7942_0182                                             | Synpcc7942_0035                             |
| Synpcc7942_0156                    | Synpcc7942_0122                                               | Synpcc7942_0233                                               | Synpcc7942_0183                                             | Synpcc7942_0039                             |
| Synpcc7942_0184                    | Synpcc7942_0181                                               | Synpcc7942_0252                                               | Synpcc7942_0193                                             | Synpcc7942_0040                             |
| Synpcc7942_0195                    | Synpcc7942_0195                                               | Synpcc7942_0415                                               | Synpcc7942_0195                                             | Synpcc7942_0053                             |
| Synpcc7942_0241                    | Synpcc7942_0215                                               | Synpcc7942_0443                                               | Synpcc7942_0196                                             | Synpcc7942_0055                             |
| Synpcc7942_0244                    | Synpcc7942_0243                                               | Synpcc7942_0662                                               | Synpcc7942_0251                                             | Synpcc7942_0058                             |
| Synpcc7942_0246                    | Synpcc7942_0244                                               | Synpcc7942_0700                                               | Synpcc7942_0252                                             | Synpcc7942_0060                             |
| Synpcc7942_0247                    | Synpcc7942_0245                                               | Synpcc7942_0764                                               | Synpcc7942_0253                                             | Synpcc7942_0061                             |
| Synpcc7942_0248                    | Synpcc7942_0253                                               | Synpcc7942_1063                                               | Synpcc7942_0267                                             | Synpcc7942_0062                             |
| Synpcc7942_0249                    | Synpcc7942_0260                                               | Synpcc7942_1071                                               | Synpcc7942_0291                                             | Synpcc7942_0069                             |
| Synpcc7942_0267                    | Synpcc7942_0267                                               | Synpcc7942_1254                                               | Synpcc7942_0316                                             | Synpcc7942_0086                             |
| Synpcc7942_0319                    | Synpcc7942_0278                                               | Synpcc7942_1419                                               | Synpcc7942_0414                                             | Synpcc7942_0096                             |
| Synpcc7942_0347                    | Synpcc7942_0279                                               | Synpcc7942_1460                                               | Synpcc7942_0415                                             | Synpcc7942_0100                             |
| Synpcc7942_0355                    | Synpcc7942_0291                                               | Synpcc7942_1506                                               | Synpcc7942_0465                                             | Synpcc7942_0108                             |
| Synpcc7942_0358                    | Synpcc7942_0312                                               | Synpcc7942_1510                                               | Synpcc7942_0497                                             | Synpcc7942_0109                             |
| Synpcc7942_0420                    | Synpcc7942_0316                                               | Synpcc7942_1542                                               | Synpcc7942_0522                                             | Synpcc7942_0110                             |
| Synpcc7942_0421                    | Synpcc7942_0422                                               | Synpcc7942_1569                                               | Synpcc7942_0523                                             | Synpcc7942_0117                             |
| Synpcc7942_0424                    | Synpcc7942_0423                                               | Synpcc7942_1587                                               | Synpcc7942_0573                                             | Synpcc7942_0122                             |
| Synpcc7942_0442                    | Synpcc7942_0425                                               | Synpcc7942_1646                                               | Synpcc7942_0599                                             | Synpcc7942_0130                             |
| Synpcc7942_0464                    | Synpcc7942_0444                                               | Synpcc7942_1824                                               | Synpcc7942_0623                                             | Synpcc7942_0147                             |
| Synpcc7942_0498                    | Synpcc7942_0450                                               | Synpcc7942_1845                                               | Synpcc7942_0677                                             | Synpcc7942_0163                             |
| Synpcc7942_0518                    | Synpcc7942_0495                                               | Synpcc7942_1958                                               | Synpcc7942_0700                                             | Synpcc7942_0180                             |
| Synpcc7942_0521                    | Synpcc7942_0497                                               | Synpcc7942_1976                                               | Synpcc7942_0741                                             | Synpcc7942_0181                             |
| Synpcc7942_0522                    | Synpcc7942_0528                                               | Synpcc7942_2187                                               | Synpcc7942_0768                                             | Synpcc7942_0192                             |

|                 |                 |                 |                 |                 |
|-----------------|-----------------|-----------------|-----------------|-----------------|
| Synpcc7942_0529 | Synpcc7942_0556 | Synpcc7942_2352 | Synpcc7942_0769 | Synpcc7942_0193 |
| Synpcc7942_0558 | Synpcc7942_0599 | Synpcc7942_2486 | Synpcc7942_0780 | Synpcc7942_0195 |
| Synpcc7942_0563 | Synpcc7942_0623 | Synpcc7942_2540 | Synpcc7942_0781 | Synpcc7942_0198 |
| Synpcc7942_0627 | Synpcc7942_0644 |                 | Synpcc7942_0834 | Synpcc7942_0199 |
| Synpcc7942_0638 | Synpcc7942_0657 |                 | Synpcc7942_0856 | Synpcc7942_0200 |
| Synpcc7942_0683 | Synpcc7942_0658 |                 | Synpcc7942_0857 | Synpcc7942_0201 |
| Synpcc7942_0797 | Synpcc7942_0677 |                 | Synpcc7942_0858 | Synpcc7942_0202 |
| Synpcc7942_0821 | Synpcc7942_0723 |                 | Synpcc7942_0900 | Synpcc7942_0205 |
| Synpcc7942_0822 | Synpcc7942_0732 |                 | Synpcc7942_0905 | Synpcc7942_0215 |
| Synpcc7942_0848 | Synpcc7942_0759 |                 | Synpcc7942_0906 | Synpcc7942_0229 |
| Synpcc7942_0917 | Synpcc7942_0762 |                 | Synpcc7942_1040 | Synpcc7942_0230 |
| Synpcc7942_0938 | Synpcc7942_0763 |                 | Synpcc7942_1082 | Synpcc7942_0236 |
| Synpcc7942_0971 | Synpcc7942_0768 |                 | Synpcc7942_1089 | Synpcc7942_0243 |
| Synpcc7942_0989 | Synpcc7942_0769 |                 | Synpcc7942_1095 | Synpcc7942_0244 |
| Synpcc7942_1056 | Synpcc7942_0779 |                 | Synpcc7942_1147 | Synpcc7942_0245 |
| Synpcc7942_1082 | Synpcc7942_0780 |                 | Synpcc7942_1150 | Synpcc7942_0252 |
| Synpcc7942_1085 | Synpcc7942_0781 |                 | Synpcc7942_1153 | Synpcc7942_0253 |
| Synpcc7942_1089 | Synpcc7942_0840 |                 | Synpcc7942_1209 | Synpcc7942_0255 |
| Synpcc7942_1124 | Synpcc7942_0855 |                 | Synpcc7942_1211 | Synpcc7942_0267 |
| Synpcc7942_1143 | Synpcc7942_0856 |                 | Synpcc7942_1212 | Synpcc7942_0278 |
| Synpcc7942_1159 | Synpcc7942_0857 |                 | Synpcc7942_1282 | Synpcc7942_0279 |
| Synpcc7942_1172 | Synpcc7942_0858 |                 | Synpcc7942_1301 | Synpcc7942_0302 |
| Synpcc7942_1183 | Synpcc7942_0900 |                 | Synpcc7942_1302 | Synpcc7942_0306 |
| Synpcc7942_1216 | Synpcc7942_0904 |                 | Synpcc7942_1303 | Synpcc7942_0307 |
| Synpcc7942_1218 | Synpcc7942_0907 |                 | Synpcc7942_1314 | Synpcc7942_0308 |
| Synpcc7942_1326 | Synpcc7942_0940 |                 | Synpcc7942_1320 | Synpcc7942_0309 |
| Synpcc7942_1360 | Synpcc7942_0989 |                 | Synpcc7942_1419 | Synpcc7942_0312 |
| Synpcc7942_1417 | Synpcc7942_1023 |                 | Synpcc7942_1420 | Synpcc7942_0316 |
| Synpcc7942_1434 | Synpcc7942_1033 |                 | Synpcc7942_1460 | Synpcc7942_0317 |
| Synpcc7942_1444 | Synpcc7942_1059 |                 | Synpcc7942_1506 | Synpcc7942_0321 |
| Synpcc7942_1458 | Synpcc7942_1062 |                 | Synpcc7942_1542 | Synpcc7942_0324 |
| Synpcc7942_1476 | Synpcc7942_1089 |                 | Synpcc7942_1646 | Synpcc7942_0349 |
| Synpcc7942_1488 | Synpcc7942_1095 |                 | Synpcc7942_1648 | Synpcc7942_0353 |
| Synpcc7942_1489 | Synpcc7942_1101 |                 | Synpcc7942_1649 | Synpcc7942_0369 |
| Synpcc7942_1490 | Synpcc7942_1102 |                 | Synpcc7942_1656 | Synpcc7942_0370 |
| Synpcc7942_1491 | Synpcc7942_1148 |                 | Synpcc7942_1661 | Synpcc7942_0371 |
| Synpcc7942_1510 | Synpcc7942_1150 |                 | Synpcc7942_1689 | Synpcc7942_0383 |
| Synpcc7942_1511 | Synpcc7942_1153 |                 | Synpcc7942_1722 | Synpcc7942_0390 |
| Synpcc7942_1557 | Synpcc7942_1154 |                 | Synpcc7942_1724 | Synpcc7942_0391 |
| Synpcc7942_1567 | Synpcc7942_1159 |                 | Synpcc7942_1728 | Synpcc7942_0415 |
| Synpcc7942_1589 | Synpcc7942_1209 |                 | Synpcc7942_1845 | Synpcc7942_0417 |
| Synpcc7942_1604 | Synpcc7942_1210 |                 | Synpcc7942_2082 | Synpcc7942_0418 |
| Synpcc7942_1756 | Synpcc7942_1211 |                 | Synpcc7942_2096 | Synpcc7942_0420 |
| Synpcc7942_1757 | Synpcc7942_1212 |                 | Synpcc7942_2125 | Synpcc7942_0421 |
| Synpcc7942_1758 | Synpcc7942_1234 |                 | Synpcc7942_2126 | Synpcc7942_0422 |
| Synpcc7942_1766 | Synpcc7942_1297 |                 | Synpcc7942_2185 | Synpcc7942_0423 |
| Synpcc7942_1767 | Synpcc7942_1298 |                 | Synpcc7942_2186 | Synpcc7942_0433 |
| Synpcc7942_1769 | Synpcc7942_1302 |                 | Synpcc7942_2187 | Synpcc7942_0443 |
| Synpcc7942_1785 | Synpcc7942_1314 |                 | Synpcc7942_2254 | Synpcc7942_0444 |
| Synpcc7942_1824 | Synpcc7942_1320 |                 | Synpcc7942_2301 | Synpcc7942_0480 |

|                 |                 |                  |                 |
|-----------------|-----------------|------------------|-----------------|
| Synpcc7942_1849 | Synpcc7942_1362 | Synpcc7942_2352  | Synpcc7942_0490 |
| Synpcc7942_1875 | Synpcc7942_1377 | Synpcc7942_2384  | Synpcc7942_0491 |
| Synpcc7942_1882 | Synpcc7942_1391 | Synpcc7942_2385  | Synpcc7942_0493 |
| Synpcc7942_1918 | Synpcc7942_1420 | Synpcc7942_2386  | Synpcc7942_0494 |
| Synpcc7942_1930 | Synpcc7942_1430 | Synpcc7942_2401  | Synpcc7942_0498 |
| Synpcc7942_1996 | Synpcc7942_1446 | Synpcc7942_2411  | Synpcc7942_0499 |
| Synpcc7942_2013 | Synpcc7942_1459 | Synpcc7942_2412  | Synpcc7942_0522 |
| Synpcc7942_2014 | Synpcc7942_1481 | Synpcc7942_2458  | Synpcc7942_0527 |
| Synpcc7942_2052 | Synpcc7942_1504 | Synpcc7942_2477  | Synpcc7942_0529 |
| Synpcc7942_2074 | Synpcc7942_1505 | Synpcc7942_2478  | Synpcc7942_0546 |
| Synpcc7942_2076 | Synpcc7942_1568 | Synpcc7942_2484  | Synpcc7942_0556 |
| Synpcc7942_2088 | Synpcc7942_1570 | Synpcc7942_2485  | Synpcc7942_0557 |
| Synpcc7942_2111 | Synpcc7942_1572 | Synpcc7942_2486  | Synpcc7942_0571 |
| Synpcc7942_2114 | Synpcc7942_1573 | Synpcc7942_2529  | Synpcc7942_0572 |
| Synpcc7942_2118 | Synpcc7942_1611 | Synpcc7942_2535  | Synpcc7942_0573 |
| Synpcc7942_2253 | Synpcc7942_1633 | Synpcc7942_2540  | Synpcc7942_0581 |
| Synpcc7942_2267 | Synpcc7942_1656 | Synpcc7942_2600  | Synpcc7942_0585 |
| Synpcc7942_2281 | Synpcc7942_1661 | Synpcc7942_2601  | Synpcc7942_0595 |
| Synpcc7942_2297 | Synpcc7942_1675 | Synpcc7942_2602  | Synpcc7942_0599 |
| Synpcc7942_2306 | Synpcc7942_1724 | Synpcc7942_2603  | Synpcc7942_0607 |
| Synpcc7942_2333 | Synpcc7942_1746 | Synpcc7942_B2634 | Synpcc7942_0620 |
| Synpcc7942_2334 | Synpcc7942_1757 | Synpcc7942_B2645 | Synpcc7942_0644 |
| Synpcc7942_2335 | Synpcc7942_1784 | Synpcc7942_B2646 | Synpcc7942_0647 |
| Synpcc7942_2349 | Synpcc7942_1797 | Synpcc7942_B2657 | Synpcc7942_0648 |
| Synpcc7942_2372 | Synpcc7942_1813 |                  | Synpcc7942_0662 |
| Synpcc7942_2470 | Synpcc7942_1820 |                  | Synpcc7942_0668 |
| Synpcc7942_2504 | Synpcc7942_1821 |                  | Synpcc7942_0677 |
| Synpcc7942_2517 | Synpcc7942_1822 |                  | Synpcc7942_0680 |
| Synpcc7942_2520 | Synpcc7942_1830 |                  | Synpcc7942_0686 |
| Synpcc7942_2602 | Synpcc7942_1836 |                  | Synpcc7942_0700 |
| Synpcc7942_2604 | Synpcc7942_1838 |                  | Synpcc7942_0703 |
|                 | Synpcc7942_1849 |                  | Synpcc7942_0704 |
|                 | Synpcc7942_1890 |                  | Synpcc7942_0705 |
|                 | Synpcc7942_1922 |                  | Synpcc7942_0720 |
|                 | Synpcc7942_1930 |                  | Synpcc7942_0732 |
|                 | Synpcc7942_1931 |                  | Synpcc7942_0733 |
|                 | Synpcc7942_1987 |                  | Synpcc7942_0734 |
|                 | Synpcc7942_2022 |                  | Synpcc7942_0735 |
|                 | Synpcc7942_2078 |                  | Synpcc7942_0736 |
|                 | Synpcc7942_2079 |                  | Synpcc7942_0737 |
|                 | Synpcc7942_2082 |                  | Synpcc7942_0738 |
|                 | Synpcc7942_2096 |                  | Synpcc7942_0742 |
|                 | Synpcc7942_2125 |                  | Synpcc7942_0743 |
|                 | Synpcc7942_2126 |                  | Synpcc7942_0744 |
|                 | Synpcc7942_2150 |                  | Synpcc7942_0747 |
|                 | Synpcc7942_2169 |                  | Synpcc7942_0748 |
|                 | Synpcc7942_2171 |                  | Synpcc7942_0749 |
|                 | Synpcc7942_2172 |                  | Synpcc7942_0750 |
|                 | Synpcc7942_2173 |                  | Synpcc7942_0751 |
|                 | Synpcc7942_2174 |                  | Synpcc7942_0753 |

Synpcc7942\_2185  
Synpcc7942\_2254  
Synpcc7942\_2297  
Synpcc7942\_2307  
Synpcc7942\_2313  
Synpcc7942\_2314  
Synpcc7942\_2326  
Synpcc7942\_2349  
Synpcc7942\_2355  
Synpcc7942\_2367  
Synpcc7942\_2380  
Synpcc7942\_2384  
Synpcc7942\_2385  
Synpcc7942\_2386  
Synpcc7942\_2401  
Synpcc7942\_2412  
Synpcc7942\_2448  
Synpcc7942\_2468  
Synpcc7942\_2477  
Synpcc7942\_2478  
Synpcc7942\_2484  
Synpcc7942\_2498  
Synpcc7942\_2499  
Synpcc7942\_2506  
Synpcc7942\_2507  
Synpcc7942\_2526  
Synpcc7942\_2535  
Synpcc7942\_2572  
Synpcc7942\_2574  
Synpcc7942\_2575  
Synpcc7942\_2590  
Synpcc7942\_2591  
Synpcc7942\_2600  
Synpcc7942\_2601  
Synpcc7942\_2602  
Synpcc7942\_2603  
Synpcc7942\_2604

Synpcc7942\_0756  
Synpcc7942\_0759  
Synpcc7942\_0760  
Synpcc7942\_0768  
Synpcc7942\_0769  
Synpcc7942\_0770  
Synpcc7942\_0780  
Synpcc7942\_0781  
Synpcc7942\_0807  
Synpcc7942\_0900  
Synpcc7942\_0904  
Synpcc7942\_0905  
Synpcc7942\_0906  
Synpcc7942\_0907  
Synpcc7942\_0940  
Synpcc7942\_0945  
Synpcc7942\_0952  
Synpcc7942\_0989  
Synpcc7942\_1040  
Synpcc7942\_1076  
Synpcc7942\_1084  
Synpcc7942\_1095  
Synpcc7942\_1097  
Synpcc7942\_1107  
Synpcc7942\_1108  
Synpcc7942\_1133  
Synpcc7942\_1134  
Synpcc7942\_1148  
Synpcc7942\_1150  
Synpcc7942\_1154  
Synpcc7942\_1158  
Synpcc7942\_1164  
Synpcc7942\_1195  
Synpcc7942\_1205  
Synpcc7942\_1209  
Synpcc7942\_1210  
Synpcc7942\_1211  
Synpcc7942\_1212  
Synpcc7942\_1227  
Synpcc7942\_1234  
Synpcc7942\_1290  
Synpcc7942\_1301  
Synpcc7942\_1302  
Synpcc7942\_1320  
Synpcc7942\_1354  
Synpcc7942\_1357  
Synpcc7942\_1370  
Synpcc7942\_1371  
Synpcc7942\_1391  
Synpcc7942\_1396

Synpcc7942\_1397  
Synpcc7942\_1398  
Synpcc7942\_1399  
Synpcc7942\_1400  
Synpcc7942\_1402  
Synpcc7942\_1411  
Synpcc7942\_1412  
Synpcc7942\_1419  
Synpcc7942\_1420  
Synpcc7942\_1430  
Synpcc7942\_1439  
Synpcc7942\_1445  
Synpcc7942\_1446  
Synpcc7942\_1460  
Synpcc7942\_1504  
Synpcc7942\_1505  
Synpcc7942\_1506  
Synpcc7942\_1539  
Synpcc7942\_1544  
Synpcc7942\_1567  
Synpcc7942\_1568  
Synpcc7942\_1569  
Synpcc7942\_1570  
Synpcc7942\_1571  
Synpcc7942\_1572  
Synpcc7942\_1573  
Synpcc7942\_1574  
Synpcc7942\_1575  
Synpcc7942\_1576  
Synpcc7942\_1579  
Synpcc7942\_1586  
Synpcc7942\_1587  
Synpcc7942\_1610  
Synpcc7942\_1611  
Synpcc7942\_1612  
Synpcc7942\_1636  
Synpcc7942\_1641  
Synpcc7942\_1644  
Synpcc7942\_1646  
Synpcc7942\_1647  
Synpcc7942\_1653  
Synpcc7942\_1654  
Synpcc7942\_1655  
Synpcc7942\_1656  
Synpcc7942\_1668  
Synpcc7942\_1669  
Synpcc7942\_1670  
Synpcc7942\_1671  
Synpcc7942\_1716  
Synpcc7942\_1724

Synpcc7942\_1725  
Synpcc7942\_1746  
Synpcc7942\_1756  
Synpcc7942\_1757  
Synpcc7942\_1766  
Synpcc7942\_1767  
Synpcc7942\_1776  
Synpcc7942\_1777  
Synpcc7942\_1784  
Synpcc7942\_1788  
Synpcc7942\_1798  
Synpcc7942\_1799  
Synpcc7942\_1800  
Synpcc7942\_1827  
Synpcc7942\_1828  
Synpcc7942\_1830  
Synpcc7942\_1838  
Synpcc7942\_1845  
Synpcc7942\_1849  
Synpcc7942\_1914  
Synpcc7942\_1922  
Synpcc7942\_1946  
Synpcc7942\_1949  
Synpcc7942\_1950  
Synpcc7942\_1958  
Synpcc7942\_1975  
Synpcc7942\_1976  
Synpcc7942\_1987  
Synpcc7942\_2002  
Synpcc7942\_2078  
Synpcc7942\_2079  
Synpcc7942\_2080  
Synpcc7942\_2082  
Synpcc7942\_2096  
Synpcc7942\_2108  
Synpcc7942\_2115  
Synpcc7942\_2126  
Synpcc7942\_2150  
Synpcc7942\_2151  
Synpcc7942\_2152  
Synpcc7942\_2171  
Synpcc7942\_2172  
Synpcc7942\_2173  
Synpcc7942\_2174  
Synpcc7942\_2185  
Synpcc7942\_2187  
Synpcc7942\_2196  
Synpcc7942\_2200  
Synpcc7942\_2237  
Synpcc7942\_2238

Synpcc7942\_2254  
Synpcc7942\_2286  
Synpcc7942\_2297  
Synpcc7942\_2301  
Synpcc7942\_2306  
Synpcc7942\_2307  
Synpcc7942\_2326  
Synpcc7942\_2333  
Synpcc7942\_2334  
Synpcc7942\_2335  
Synpcc7942\_2336  
Synpcc7942\_2349  
Synpcc7942\_2352  
Synpcc7942\_2353  
Synpcc7942\_2367  
Synpcc7942\_2380  
Synpcc7942\_2384  
Synpcc7942\_2385  
Synpcc7942\_2386  
Synpcc7942\_2387  
Synpcc7942\_2388  
Synpcc7942\_2401  
Synpcc7942\_2404  
Synpcc7942\_2412  
Synpcc7942\_2424  
Synpcc7942\_2431  
Synpcc7942\_2432  
Synpcc7942\_2447  
Synpcc7942\_2448  
Synpcc7942\_2458  
Synpcc7942\_2461  
Synpcc7942\_2476  
Synpcc7942\_2477  
Synpcc7942\_2478  
Synpcc7942\_2484  
Synpcc7942\_2485  
Synpcc7942\_2486  
Synpcc7942\_2498  
Synpcc7942\_2499  
Synpcc7942\_2500  
Synpcc7942\_2506  
Synpcc7942\_2507  
Synpcc7942\_2535  
Synpcc7942\_2540  
Synpcc7942\_2549  
Synpcc7942\_2551  
Synpcc7942\_2552  
Synpcc7942\_2553  
Synpcc7942\_2554  
Synpcc7942\_2555

Synpcc7942\_2556  
Synpcc7942\_2557  
Synpcc7942\_2558  
Synpcc7942\_2590  
Synpcc7942\_2591  
Synpcc7942\_2599  
Synpcc7942\_2600  
Synpcc7942\_2601  
Synpcc7942\_2602  
Synpcc7942\_2603  
Synpcc7942\_2604  
Synpcc7942\_2609  
Synpcc7942\_B2636  
Synpcc7942\_B2638  
Synpcc7942\_B2639  
Synpcc7942\_B2644  
Synpcc7942\_B2658  
Synpcc7942\_B2663  
Synpcc7942\_R0014  
Synpcc7942\_R0018  
Synpcc7942\_R0027  
Synpcc7942\_R0046  
Synpcc7942\_R0053

\* (Log2 normalized to average 'Low Light' expression >1); Minutes in Shade = 60. Hours since dawn = 9.

*Supplemental references*

- S1 Welkie, D.G., et al. (2018) Genome-wide fitness assessment during diurnal growth reveals an expanded role of the cyanobacterial circadian clock protein KaiA. *Proc. Natl. Acad. Sci. U. S. A.* 115, E7174-E7183
- S2 Hosokawa, N., et al. (2011) Circadian transcriptional regulation by the posttranslational oscillator without de novo clock gene expression in *Synechococcus*. *Proc. Natl. Acad. Sci. U. S. A.* 108, 15396-15401
- S3 Hood, R.D., et al. (2016) The stringent response regulates adaptation to darkness in the cyanobacterium *Synechococcus elongatus*. *Proc. Natl. Acad. Sci. U. S. A.* 113, E4867-4876
- S4 Piechura, J.R., et al. (2017) Natural changes in light interact with circadian regulation at promoters to control gene expression in cyanobacteria. *Elife* 6, e32032
